# Supplementary material for: Improving the Classification of PCNSL and Brain Metastases by Developing a Machine Learning Model Based on 18F-FDG PET
Source: MDPI journal article supplement (doi:10.3390/jpm13030539), 2023-03-17
Supplement: s1 [file s1]

## *Supplementary Material*

**Table S1. The TRIPOD checklist**

| Section/topic             | Item | Development or validation? | Checklist item                                                                                                                                                                                  | explanation                                                                    |
|---------------------------|------|----------------------------|-------------------------------------------------------------------------------------------------------------------------------------------------------------------------------------------------|--------------------------------------------------------------------------------|
| Title and abstract        |      |                            |                                                                                                                                                                                                 |                                                                                |
| Title                     | 1    | D;V                        | Identify the study as developing and/or validating a multivariable prediction model, the target population, and the outcome to be predicted                                                     | Described in Title                                                             |
| Abstract                  | 2    | D;V                        | Provide a summary of objectives, study design, setting, participants, sample size, predictors, outcome, statistical analysis, results, and conclusions                                          | Presented in Abstract                                                          |
| Introduction              |      |                            |                                                                                                                                                                                                 |                                                                                |
| Background and objectives | 3a   | D;V                        | Explain the medical context (including whether diagnostic or prognostic) and rationale for developing or validating the multivariable prediction model, including references to existing models | Presented in Introduction                                                      |
|                           | 3b   | D;V                        | Specify the objectives, including whether the study describes the development or validation of the model, or both                                                                               | Develop a classification model.                                                |
| Methods                   |      |                            |                                                                                                                                                                                                 |                                                                                |
| Source of data            | 4a   | D;V                        | Describe the study design or source of data (for example, randomised trial, cohort, or registry data), separately for the development and validation data sets, if applicable                   | This is a retrospective study.<br>Details in the section of study participants |
|                           | 4b   | D;V                        | Specify the key study dates, including start of accrual; end of accrual; and, if applicable, end of follow-up                                                                                   | May 2016 to May 2022                                                           |
| Participants              | 5a   | D;V                        | Specify key elements of the study setting (for example, primary care, secondary care, general population) including number and location of centres                                              | This is a single-center study                                                  |
|                           | 5b   | D;V                        | Describe eligibility criteria for participants                                                                                                                                                  | Details in the section of study participants                                   |
|                           | 5c   | D;V                        | Give details of treatments received, if relevant                                                                                                                                                | Patients who received treatment were excluded.                                 |

|                              |     |     |                                                                                                                                                                                                      |                                                                                     |
|------------------------------|-----|-----|------------------------------------------------------------------------------------------------------------------------------------------------------------------------------------------------------|-------------------------------------------------------------------------------------|
| Outcome                      | 6a  | D;V | Clearly define the outcome that is predicted by the prediction model, including how and when assessed                                                                                                | This is a classification model.                                                     |
|                              | 6b  | D;V | Report any actions to blind assessment of the outcome to be predicted                                                                                                                                | Predict the type of pathology which is blind to images.                             |
| Predictors                   | 7a  | D;V | Clearly define all predictors used in developing the multivariable prediction model, including how and when they were measured                                                                       | All the information is presented in the segmentation of images, Feature extraction. |
|                              | 7b  | D;V | Report any actions to blind assessment of predictors for the outcome and other predictors                                                                                                            | The VOI blinded to the classification result                                        |
| Sample size                  | 8   | D;V | Explain how the study size was arrived at.                                                                                                                                                           | All patients who met the inclusion criteria were included                           |
| Missing data                 | 9   | D;V | Describe how missing data were handled (for example, complete-case analysis, single imputation, multiple imputation) with details of any imputation method                                           | None of the data was missing                                                        |
| Statistical analysis methods | 10a | D   | Describe how predictors were handled in the analyses                                                                                                                                                 | Described in pre-process of datasets and dimensionality reduction                   |
|                              | 10b | D   | Specify type of model, all model-building procedures (including any predictor selection), and method for internal validation                                                                         | Described in fitting the model and internal cross-validation                        |
|                              | 10c | V   | For validation, describe how the predictions were calculated                                                                                                                                         | As described in the External test                                                   |
|                              | 10d | D;V | Specify all measures used to assess model performance and, if relevant, to compare multiple models                                                                                                   | The weighted average F1 score and AUC of ROC                                        |
|                              | 10e | V   | Describe any model updating (for example, recalibration) arising from the validation, if done                                                                                                        | NOT APPLICABLE                                                                      |
| Risk groups                  | 11  | D;V | Provide details on how risk groups were created, if done                                                                                                                                             | NOT INCLUDED                                                                        |
| Development v validation     | 12  | V   | For validation, identify any differences from the development data in setting, eligibility criteria, outcome, and predictors                                                                         |                                                                                     |
| Results                      |     |     |                                                                                                                                                                                                      |                                                                                     |
| Participants                 | 13a | D;V | Describe the flow of participants through the study, including the number of participants with and without the outcome and, if applicable, a summary of the follow-up time. A diagram may be helpful | Presented in Figure 1 and Table 1.                                                  |

|                           |     |     |                                                                                                                                                                                                   |                                                                                                 |
|---------------------------|-----|-----|---------------------------------------------------------------------------------------------------------------------------------------------------------------------------------------------------|-------------------------------------------------------------------------------------------------|
|                           | 13b | D;V | Describe the characteristics of the participants (basic demographics, clinical features, available predictors), including the number of participants with missing data for predictors and outcome | Presented in the study participants and Table 1.                                                |
|                           | 13c | V   | For validation, show a comparison with the development data of the distribution of important variables (demographics, predictors and outcome).                                                    |                                                                                                 |
| Model development         | 14a | D   | Specify the number of participants and outcome events in each analysis                                                                                                                            | Presented in Table 2                                                                            |
|                           | 14b | D   | If done, report the unadjusted association between each candidate predictor and outcome                                                                                                           | This has not been performed.                                                                    |
| Model specification       | 15a | D   | Present the full prediction model to allow predictions for individuals (that is, all regression coefficients, and model intercept or baseline survival at a given time point)                     | The features and hyperparameters used to create the model are presented in the results section. |
|                           | 15b | D   | Explain how to use the prediction model                                                                                                                                                           |                                                                                                 |
| Model performance         | 16  | D;V | Report performance measures (with CIs) for the prediction model                                                                                                                                   | The ROC and the F1 score                                                                        |
| Model updating            | 17  | V   | If done, report the results from any model updating (that is, model specification, model performance)                                                                                             |                                                                                                 |
| Discussion                |     |     |                                                                                                                                                                                                   |                                                                                                 |
| Limitations               | 18  | D;V | Discuss any limitations of the study (such as nonrepresentative sample, few events per predictor, missing data)                                                                                   | The limitation is illustrated in the discussion section.                                        |
| Interpretation            | 19a | V   | For validation, discuss the results with reference to performance in the development data, and any other validation data                                                                          | Validated by data without resampling.                                                           |
|                           | 19b | D;V | Give an overall interpretation of the results, considering objectives, limitations, results from similar studies, and other relevant evidence                                                     | In discussion section                                                                           |
| Implications              | 20  | D;V | Discuss the potential clinical use of the model and implications for future research                                                                                                              |                                                                                                 |
| Other information         |     |     |                                                                                                                                                                                                   |                                                                                                 |
| Supplementary information | 21  | D;V | Provide information about the availability of supplementary resources, such as study protocol, Web calculator, and data sets                                                                      | Table S2 provides all the features used in the study (Table S2) .                               |

|         |    |     |                                                                              |                 |
|---------|----|-----|------------------------------------------------------------------------------|-----------------|
| Funding | 22 | D;V | Give the source of funding and the role of the funders for the present study | In Declaration. |
|---------|----|-----|------------------------------------------------------------------------------|-----------------|

---

\*Items relevant only to the development of a prediction model are denoted by D, items relating solely to a validation of a prediction model are denoted by V, and items relating to both are denoted D;V.

**Table S2. The features list of the group of density characters and the group of multi-class characters**

|                   | Group of Multi-Class features | Group of density features |
|-------------------|-------------------------------|---------------------------|
| Feature Class     | Feature Name                  | Feature Name              |
| <b>firstorder</b> | 10Percentile                  | 10Percentile              |
|                   | 90Percentile                  | 90Percentile              |
|                   | Energy                        | Maximum                   |
|                   | Entropy                       | Minimum                   |
|                   | InterquartileRange            | Range                     |
|                   | Kurtosis                      | Energy                    |
|                   | Maximum                       |                           |
|                   | MeanAbsoluteDeviation         |                           |
|                   | Mean                          |                           |
|                   | Median                        |                           |
|                   | Minimum                       |                           |
|                   | Range                         |                           |
|                   | RobustMeanAbsoluteDeviation   |                           |
|                   | RootMeanSquared               |                           |
|                   | Skewness                      |                           |
|                   | TotalEnergy                   |                           |
|                   | Uniformity                    |                           |
|                   | Variance                      |                           |
| <b>glcm</b>       | Autocorrelation               |                           |
|                   | ClusterProminence             |                           |
|                   | ClusterShade                  |                           |
|                   | ClusterTendency               |                           |
|                   | Contrast                      |                           |
|                   | Correlation                   |                           |
|                   | DifferenceAverage             |                           |
|                   | DifferenceEntropy             |                           |
|                   | DifferenceVariance            |                           |
|                   | Id                            |                           |
|                   | Idm                           |                           |
|                   | Idmn                          |                           |
|                   | Idn                           |                           |
|                   | Imc1                          |                           |
|                   | Imc2                          |                           |
|                   | InverseVariance               |                           |
|                   | JointAverage                  |                           |
|                   | JointEnergy                   |                           |
|                   | JointEntropy                  |                           |
|                   | MCC                           |                           |

|       |                                      |
|-------|--------------------------------------|
|       | MaximumProbability                   |
|       | SumAverage                           |
|       | SumEntropy                           |
|       | SumSquares                           |
|       | DependenceEntropy                    |
|       | DependenceNonUniformity              |
|       | DependenceNonUniformityNormalized    |
|       | DependenceVariance                   |
|       | GrayLevelNonUniformity               |
|       | GrayLevelVariance                    |
|       | HighGrayLevelEmphasis                |
|       | LargeDependenceEmphasis              |
|       | LargeDependenceHighGrayLevelEmphasis |
|       | LargeDependenceLowGrayLevelEmphasis  |
|       | LowGrayLevelEmphasis                 |
|       | SmallDependenceEmphasis              |
|       | SmallDependenceHighGrayLevelEmphasis |
|       | SmallDependenceLowGrayLevelEmphasis  |
|       | GrayLevelNonUniformity               |
|       | GrayLevelNonUniformityNormalized     |
|       | GrayLevelVariance                    |
|       | HighGrayLevelRunEmphasis             |
|       | LongRunEmphasis                      |
|       | LongRunHighGrayLevelEmphasis         |
|       | LongRunLowGrayLevelEmphasis          |
|       | LowGrayLevelRunEmphasis              |
|       | RunEntropy                           |
|       | RunLengthNonUniformity               |
|       | RunLengthNonUniformityNormalized     |
|       | RunPercentage                        |
|       | RunVariance                          |
|       | ShortRunEmphasis                     |
|       | ShortRunHighGrayLevelEmphasis        |
|       | ShortRunLowGrayLevelEmphasis         |
| glszm | GrayLevelNonUniformity               |
|       | GrayLevelNonUniformityNormalized     |
|       | GrayLevelVariance                    |
|       | HighGrayLevelZoneEmphasis            |
|       | LargeAreaEmphasis                    |
|       | LargeAreaHighGrayLevelEmphasis       |
|       | LargeAreaLowGrayLevelEmphasis        |
|       | LowGrayLevelZoneEmphasis             |
|       | SizeZoneNonUniformity                |

|              |                                 |
|--------------|---------------------------------|
|              | SizeZoneNonUniformityNormalized |
|              | SmallAreaEmphasis               |
|              | SmallAreaHighGrayLevelEmphasis  |
|              | SmallAreaLowGrayLevelEmphasis   |
|              | ZoneEntropy                     |
|              | ZonePercentage                  |
|              | ZoneVariance                    |
| <b>ngtdm</b> | Busyness                        |
|              | Coarseness                      |
|              | Complexity                      |
|              | Contrast                        |
|              | Strength                        |

**Table S3. The PCA loading vectors**

| Features   |                             | PCA Component 1 | PCA Component 2 | PCA Component 3 | PCA Component 4 | PCA Component 5 | PCA Component 6 |
|------------|-----------------------------|-----------------|-----------------|-----------------|-----------------|-----------------|-----------------|
| firstorder | 10Percentile                | -0.112817629    | 0.025943668     | -0.113812421    | 0.013057658     | -0.108794692    | 0.214837365     |
| firstorder | 90Percentile                | -0.125775099    | 0.048282253     | -0.072328859    | 0.010512173     | -0.059666243    | 0.10668376      |
| firstorder | Energy                      | -0.100829476    | 0.094310343     | 0.007789189     | -0.199713764    | 0.098378732     | 0.139199344     |
| firstorder | Entropy                     | -0.131019331    | -0.009438704    | 0.059701806     | 0.019628285     | -0.046500535    | 0.01809269      |
| firstorder | InterquartileRange          | -0.12744646     | 0.07013338      | -0.027814876    | -0.019731245    | 0.026338829     | -0.01475991     |
| firstorder | Kurtosis                    | 0.049331837     | 0.090031753     | 0.17595536      | 0.276503475     | 0.023156254     | 0.061558916     |
| firstorder | Maximum                     | -0.126572607    | 0.057493535     | -0.049687659    | 0.040038992     | -0.081886374    | 0.067842814     |
| firstorder | MeanAbsoluteDeviation       | -0.128412207    | 0.068978246     | -0.02561583     | 0.006317289     | 0.000759849     | -0.01564571     |
| firstorder | Mean                        | -0.122484544    | 0.041432331     | -0.087302266    | -0.003430344    | -0.067273756    | 0.154624778     |
| firstorder | Median                      | -0.122282199    | 0.041333134     | -0.087208981    | -0.02207969     | -0.054835001    | 0.166091581     |
| firstorder | Minimum                     | -0.08831641     | -0.004977091    | -0.146422049    | 0.028966283     | -0.165211309    | 0.314773624     |
| firstorder | Range                       | -0.127172905    | 0.075096444     | -0.006974784    | 0.039833439     | -0.040739537    | -0.03461616     |
| firstorder | RobustMeanAbsoluteDeviation | -0.127967667    | 0.069001861     | -0.027847467    | -0.0101033      | 0.019556166     | -0.01385084     |
| firstorder | RootMeanSquared             | -0.123299419    | 0.043388232     | -0.084189066    | -0.002459031    | -0.063762168    | 0.145531787     |
| firstorder | Skewness                    | 0.044803346     | 0.077693653     | 0.145766869     | 0.294122452     | -0.105694681    | -0.095986679    |
| firstorder | TotalEnergy                 | -0.100829476    | 0.094310343     | 0.007789189     | -0.199713764    | 0.098378732     | 0.139199344     |



|            |                    |              |              |              |              |              |              |
|------------|--------------------|--------------|--------------|--------------|--------------|--------------|--------------|
| firstorder | Uniformity         | 0.116599642  | 0.086737038  | -0.128682386 | -0.014593528 | 0.03812797   | -0.028559708 |
| firstorder | Variance           | -0.125083128 | 0.077757441  | -0.036061204 | -0.009985811 | 0.079866582  | -0.068768966 |
| 18         |                    |              |              |              |              |              |              |
| glcm       | Autocorrelation    | -0.125309666 | 0.073931329  | -0.0287298   | -0.037549332 | 0.101580733  | -0.049534598 |
| glcm       | ClusterProminence  | -0.115236366 | 0.086030843  | -0.031528357 | -0.034045961 | 0.142355488  | -0.138908184 |
| glcm       | ClusterShade       | -0.044626371 | -0.006901487 | -0.006256869 | 0.292514269  | -0.281211005 | -0.130367215 |
| glcm       | ClusterTendency    | -0.126121719 | 0.073510044  | -0.024171252 | -0.005414662 | 0.066555905  | -0.083876928 |
| glcm       | Contrast           | -0.122371449 | 0.038136964  | -0.061474825 | 0.120845823  | 0.027930762  | -0.097060293 |
| glcm       | Correlation        | -0.024616313 | 0.221271753  | 0.047557197  | -0.051682993 | -0.246399368 | -0.075811338 |
| glcm       | DifferenceAverage  | -0.130181342 | 0.002186167  | -0.038341027 | 0.0936345    | -0.007639803 | -0.015204748 |
| glcm       | DifferenceEntropy  | -0.130676782 | -0.017505369 | 0.02868243   | 0.062013636  | -0.056335938 | 0.009941397  |
| glcm       | DifferenceVariance | -0.123441774 | 0.043267229  | -0.050591116 | 0.113599643  | 0.021512541  | -0.110988583 |
| glcm       | Id                 | 0.1280512    | 0.060257939  | -0.002496651 | -0.058659534 | 0.034637813  | -0.057672169 |
| glcm       | Idm                | 0.128587268  | 0.052079758  | 0.004193615  | -0.062449936 | 0.03965773   | -0.062762816 |
| glcm       | Idmn               | -0.008956282 | 0.206775924  | 0.097439661  | -0.040265063 | -0.278371635 | 0.009846512  |
| glcm       | Idn                | 0.052079812  | 0.222525533  | 0.036329434  | -0.053978616 | -0.154636366 | -0.071446881 |
| glcm       | Imc1               | -0.011036791 | 0.070424696  | -0.213697017 | -0.03514034  | -0.245675692 | 0.165769324  |
| glcm       | Imc2               | -0.097442    | -0.072417755 | 0.205379325  | 0.036773651  | 0.025912761  | -0.063781821 |
| glcm       | InverseVariance    | 0.004772159  | -0.21603094  | 0.155264573  | -0.098470901 | 0.026783996  | 0.040536708  |

|      |                                      |              |              |              |              |              |              |
|------|--------------------------------------|--------------|--------------|--------------|--------------|--------------|--------------|
| glcm | JointAverage                         | -0.131538062 | 0.047491693  | -0.007993595 | -0.01333747  | 0.025064206  | -0.002901549 |
| glcm | JointEnergy                          | 0.101476599  | 0.122400452  | -0.162670169 | 0.004999784  | 0.050357426  | -0.01097908  |
| glcm | JointEntropy                         | -0.130262599 | -0.003983087 | 0.054365346  | 0.023013027  | -0.080055089 | 0.007158888  |
| glcm | MCC                                  | -0.011283716 | 0.197158627  | -0.025344364 | -0.072128387 | -0.125595108 | -0.015328159 |
| glcm | MaximumProbability                   | 0.113069359  | 0.101558069  | -0.111755256 | 0.006081462  | 0.078357316  | -0.026986498 |
| glcm | SumAverage                           | -0.131538062 | 0.047491693  | -0.007993595 | -0.01333747  | 0.025064206  | -0.00290155  |
| glcm | SumEntropy                           | -0.127795444 | -0.003153894 | 0.088808026  | 0.007439874  | -0.085564395 | -0.011724768 |
| glcm | SumSquares                           | -0.126877325 | 0.067675876  | -0.031504785 | 0.018394003  | 0.060026124  | -0.087343516 |
| gldm | DependenceEntropy                    | -0.102971557 | 0.089251368  | 0.14797567   | -0.061410317 | -0.17696039  | -0.048507319 |
| gldm | DependenceNonUniformity              | -0.100088761 | 0.12172558   | 0.089633187  | -0.115851818 | 0.101003725  | 0.108338376  |
| gldm | DependenceNonUniformityNormalized    | -0.081210401 | -0.108397154 | -0.135594288 | 0.159817005  | 0.171298832  | 0.120382133  |
| gldm | DependenceVariance                   | 0.09320135   | 0.14050296   | 0.111173527  | 0.006032334  | 0.049559576  | -0.00946956  |
| gldm | GrayLevelNonUniformity               | 0.053000387  | 0.169710415  | 0.205613702  | 0.087758008  | 0.089896999  | 0.153970678  |
| gldm | GrayLevelVariance                    | -0.126066504 | 0.071625425  | -0.029643902 | -0.011913782 | 0.084376503  | -0.070998117 |
| gldm | HighGrayLevelEmphasis                | -0.125027917 | 0.075008303  | -0.025616102 | -0.044385325 | 0.103522618  | -0.050867455 |
| gldm | LargeDependenceEmphasis              | 0.100009541  | 0.16977572   | 0.016291332  | 0.036210975  | 0.009333298  | -0.002189223 |
| gldm | LargeDependenceHighGrayLevelEmphasis | -0.090915688 | 0.105556428  | 0.06854451   | -0.249554924 | 0.14634198   | 0.00735759   |
| gldm | LargeDependenceLowGrayLevelEmphasis  | 0.080232733  | 0.182788471  | -0.105641026 | 0.109327199  | 0.035587013  | 0.077484229  |
| gldm | LowGrayLevelEmphasis                 | 0.107575929  | 0.089196856  | -0.141900928 | 0.022193193  | 0.112626707  | -0.05970987  |

|       |                                      |              |              |              |              |              |              |
|-------|--------------------------------------|--------------|--------------|--------------|--------------|--------------|--------------|
| gldm  | SmallDependenceEmphasis              | -0.111977647 | -0.051563401 | -0.09582126  | 0.117779101  | 0.080167655  | 0.122952906  |
| gldm  | SmallDependenceHighGrayLevelEmphasis | -0.119219626 | 0.060393457  | -0.060237728 | 0.075186643  | 0.097385638  | -0.136508953 |
| gldm  | SmallDependenceLowGrayLevelEmphasis  | 0.03108347   | -0.174061154 | -0.092639425 | 0.027388011  | 0.158283358  | 0.232869896  |
| glrlm | GrayLevelNonUniformity               | 0.014595144  | 0.14934932   | 0.239990125  | -0.112636834 | -0.042313624 | 0.104820171  |
| glrlm | GrayLevelNonUniformityNormalized     | 0.112873167  | 0.081106692  | -0.158232055 | -0.04056602  | 0.013055707  | -0.033521244 |
| glrlm | GrayLevelVariance                    | -0.126140038 | 0.071552818  | -0.027906439 | -0.004552302 | 0.081302873  | -0.078264651 |
| glrlm | HighGrayLevelRunEmphasis             | -0.125480332 | 0.074308667  | -0.025365386 | -0.033506541 | 0.097990809  | -0.057862367 |
| glrlm | LongRunEmphasis                      | 0.086980808  | 0.183411604  | 0.003879245  | 0.122035657  | 0.06371106   | 0.088664208  |
| glrlm | LongRunHighGrayLevelEmphasis         | -0.118577872 | 0.094991905  | 0.012544465  | -0.101165968 | 0.117897798  | -0.042903384 |
| glrlm | LongRunLowGrayLevelEmphasis          | 0.07614801   | 0.180207712  | -0.081889156 | 0.147758963  | 0.076007544  | 0.130558714  |
| glrlm | LowGrayLevelRunEmphasis              | 0.108406272  | 0.078794178  | -0.155644129 | -0.014813334 | 0.091748773  | -0.075727468 |
| glrlm | RunEntropy                           | -0.11393373  | 0.086214558  | 0.131043872  | 0.024769574  | -0.089106373 | -0.00265329  |
| glrlm | RunLengthNonUniformity               | -0.104127143 | 0.097612772  | 0.074052379  | -0.192327176 | 0.046322725  | 0.069762037  |
| glrlm | RunLengthNonUniformityNormalized     | -0.114213108 | -0.119874024 | -0.052264366 | 0.044860657  | 0.026265587  | 0.076021345  |
| glrlm | RunPercentage                        | -0.109139786 | -0.145311571 | -0.03784403  | 0.01583247   | 0.013663138  | 0.050294832  |
| glrlm | RunVariance                          | 0.075585149  | 0.160397408  | 0.112957612  | 0.178974972  | 0.138912221  | 0.12728559   |
| glrlm | ShortRunEmphasis                     | -0.10944442  | -0.14423928  | 0.02795521   | 0.029300805  | 0.027125111  | 0.070464131  |
| glrlm | ShortRunHighGrayLevelEmphasis        | -0.125807482 | 0.071837508  | -0.031312856 | -0.019049437 | 0.095954661  | -0.063155535 |
| glrlm | ShortRunLowGrayLevelEmphasis         | 0.105477601  | -0.036157968 | -0.105897725 | -0.063135459 | 0.174092355  | -0.132970537 |

|       |                                  |              |              |              |              |              |              |
|-------|----------------------------------|--------------|--------------|--------------|--------------|--------------|--------------|
| glszm | GrayLevelNonUniformity           | -0.105153095 | 0.085632161  | 0.039672531  | -0.179788464 | 0.054564393  | 0.132665388  |
| glszm | GrayLevelNonUniformityNormalized | 0.10817899   | 0.078899517  | -0.148280943 | -0.083401706 | -0.018939871 | 0.002035075  |
| glszm | GrayLevelVariance                | -0.122853455 | 0.05236549   | 0.003340686  | 0.093334572  | -0.043586147 | -0.161161062 |
| glszm | HighGrayLevelZoneEmphasis        | -0.12472589  | 0.063746685  | -0.01290383  | 0.067476983  | 0.03593707   | -0.145622921 |
| glszm | LargeAreaEmphasis                | 0.065349342  | 0.177310116  | 0.033569226  | 0.166074428  | 0.089229462  | 0.175110901  |
| glszm | LargeAreaHighGrayLevelEmphasis   | 0.0387698    | 0.101940463  | 0.211264044  | -0.062147398 | 0.009419725  | 0.004616875  |
| glszm | LargeAreaLowGrayLevelEmphasis    | 0.05691339   | 0.173186222  | -0.03353087  | 0.188805885  | 0.091852591  | 0.209414125  |
| glszm | LowGrayLevelZoneEmphasis         | 0.11213039   | 0.036204647  | -0.11469107  | -0.091794637 | -0.006435172 | -0.051753122 |
| glszm | SizeZoneNonUniformity            | -0.114558961 | 0.091122742  | -0.013945642 | -0.122912234 | 0.130921857  | 0.009554803  |
| glszm | SizeZoneNonUniformityNormalized  | 0.045622454  | 0.120548779  | -0.277344352 | -0.014408475 | -0.035331118 | 0.005506011  |
| glszm | SmallAreaEmphasis                | -0.102113007 | -0.053819459 | 0.054470635  | 0.059209195  | -0.056291146 | 0.214126331  |
| glszm | SmallAreaHighGrayLevelEmphasis   | -0.119464588 | 0.063626727  | -0.028407192 | 0.091227783  | 0.037212822  | -0.165015145 |
| glszm | SmallAreaLowGrayLevelEmphasis    | 0.046261233  | -0.109484242 | 0.071411805  | -0.073451943 | -0.068598431 | 0.169967862  |
| glszm | ZoneEntropy                      | -0.125109626 | 0.007989     | 0.104829597  | 0.039489618  | -0.039736586 | 0.043818137  |
| glszm | ZonePercentage                   | -0.101334431 | -0.069085984 | -0.120359729 | 0.125026203  | 0.143795777  | 0.097397177  |
| glszm | ZoneVariance                     | 0.042832399  | 0.101584032  | 0.216564674  | 0.212009213  | 0.209009542  | 0.150862873  |
| ngtdm | Busyness                         | 0.067726255  | 0.026688244  | 0.184642196  | 0.044267808  | 0.247258934  | -0.003111602 |
| ngtdm | Coarseness                       | 0.058080273  | 0.157622042  | -0.224924288 | -0.022147327 | -0.125292021 | 0.029331405  |
| ngtdm | Complexity                       | -0.118612803 | 0.061934925  | -0.04749836  | 0.10571901   | 0.031281478  | -0.152607716 |

|       |          |              |              |              |             |              |              |
|-------|----------|--------------|--------------|--------------|-------------|--------------|--------------|
| ngtdm | Contrast | -0.114901524 | -0.04275837  | -0.092169754 | 0.087834874 | 0.124024506  | -0.005675122 |
| ngtdm | Strength | -0.101213785 | -0.057167884 | -0.066864141 | 0.238387418 | -0.025244277 | -0.09110539  |

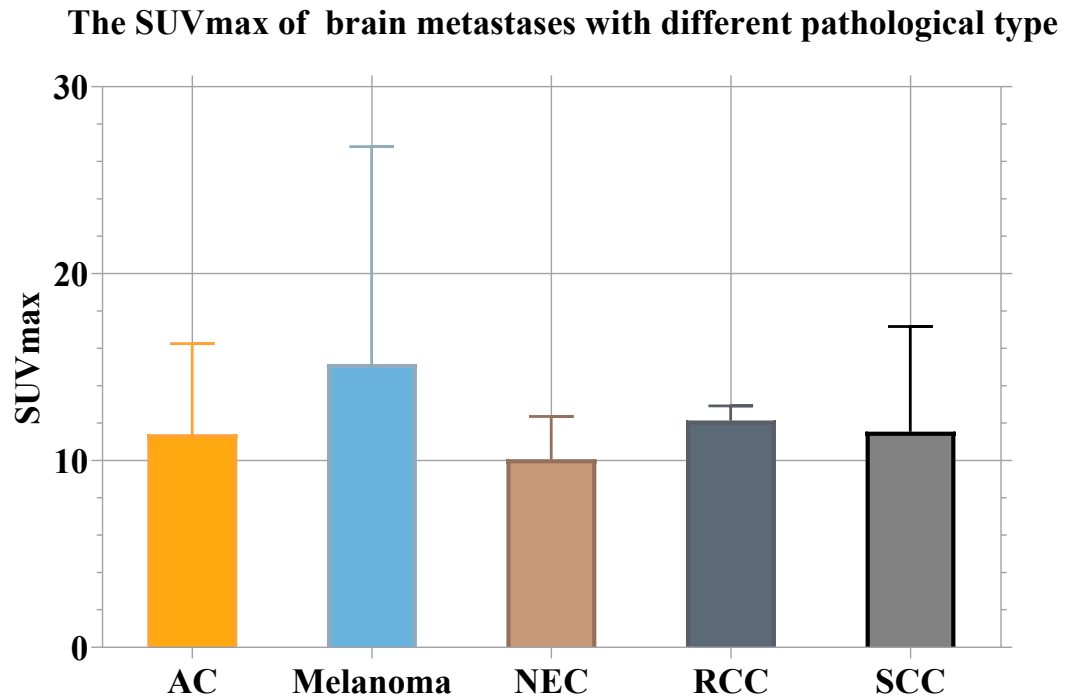

**Figure S1. The SUVmax of brain metastases with different pathology.**

Figure S1 The average SUVmax values of the lesions with different pathological types. The ANOVA testing found no difference in the average SUVmax among different pathological types ( $P=0.5213$ ). The average SUVmax of adenocarcinoma, melanoma, neuroendocrine carcinoma, Renal clear cell cancer, and squamous carcinoma was  $11.4 \pm 4.85$ ,  $15.17 \pm 11.63$ ,  $10.07 \pm 2.282$ ,  $12.14 \pm 0.7797$ , and  $11.54 \pm 5.632$ , respectively.

AC: Adenocarcinoma, NEC: Neuroendocrine carcinoma, SCC: Squamous carcinoma, and RCC: Renal clear cell cancer.
